# Supplementary material for: SARS-CoV-2 Uses Nonstructural Protein 16 To Evade Restriction by IFIT1 and IFIT3
Source: PubMed Central journal article supplement (PMC9973020; doi:10.1128/jvi.01532-22), 2023-02-01
Supplement: jvi.01532-22-s0001.pdf [file jvi.01532-22-s0001.pdf]

a

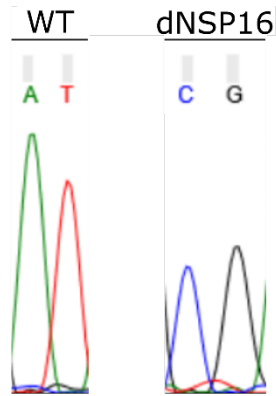

b

QTQTN Furin site

|          |             |                 |            |                        |
|----------|-------------|-----------------|------------|------------------------|
| WA1/2020 | GCGCTAGTTAT | CAGACTCAGACTAAT | TCTCCTCGGC | GGGCACGTAGTGTAGCTAGTCA |
| WT       | GCGCTAGTTAT | CAGACTCAGACTAAT | TCTCCTCGGC | GGGCACGTAGTGTAGCTAGTCA |
| dNSP16   | GCGCTAGTTAT | CAGACTCAGACTAAT | TCTCCTCGGC | GGGCACGTAGTGTAGCTAGTCA |

861

862 **Figure S1. D130 mutation is stable in rescued dNSP16, and rescued infectious clone stocks**  
863 **maintain sequence around furin cleavage site.** Viral RNA was extracted from the viral stocks used in  
864 the study ("WT" and "dNSP16"). Viral RNA was reverse-transcribed, PCR-amplified around the site of  
865 interest, and Sanger sequenced. (a) Shown are the sequencing traces of the 2-base pair site within  
866 codon 130 of NSP16 that was mutated from AT to CG to engineer dNSP16. (b) Validated sequence  
867 around the furin cleavage site, including the QTQTN motif, for WT and dNSP16, compared to the  
868 published sequence for WA1/2020.

869

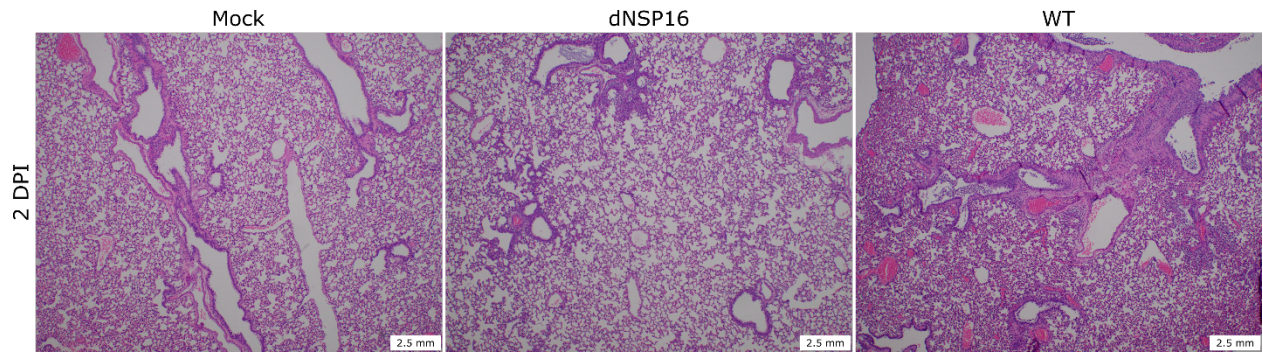

871

872 **Figure S2. dNSP16 is attenuated *in vivo*.** A 100  $\mu$ L inoculum of PBS (mock) or  $10^4$  plaque-forming  
873 units of either dNSP16 or WT was given intranasally to 4- to 5-week-old Syrian hamsters. Shown are  
874 hematoxylin and eosin staining of representative 5  $\mu$ m-thick sections taken from left lung lobes of animals  
875 sacrificed at 2 days post-infection (DPI).

876

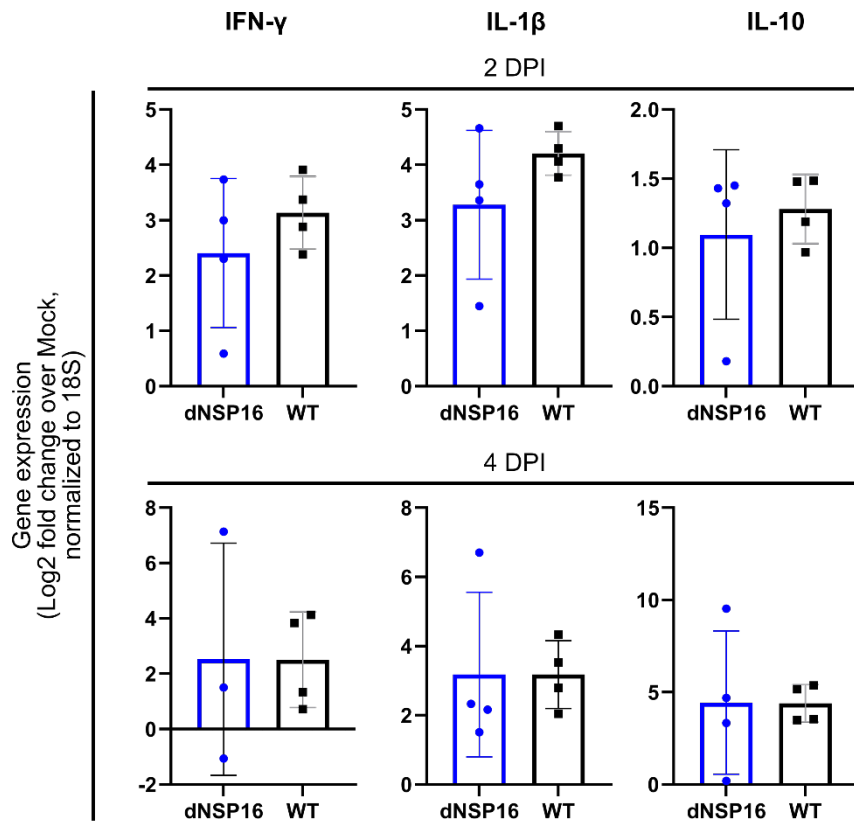

877

878 **Figure S3. dNSP16 does not drive increased immune gene expression relative to WT.** Fold change  
 879 (log<sub>2</sub>) of expression of the indicated immune genes from lung samples isolated from hamsters infected  
 880 with the indicated virus, 2 or 4 days post-infection. For each panel, fold changes from dNSP16 or WT  
 881 samples are measured relative to mock samples. Values from individual hamsters are plotted (symbols)  
 882 as well as means (bars). Error bars denote standard deviation. All samples were normalized to 18S  
 883 expression, used as a reference.

884



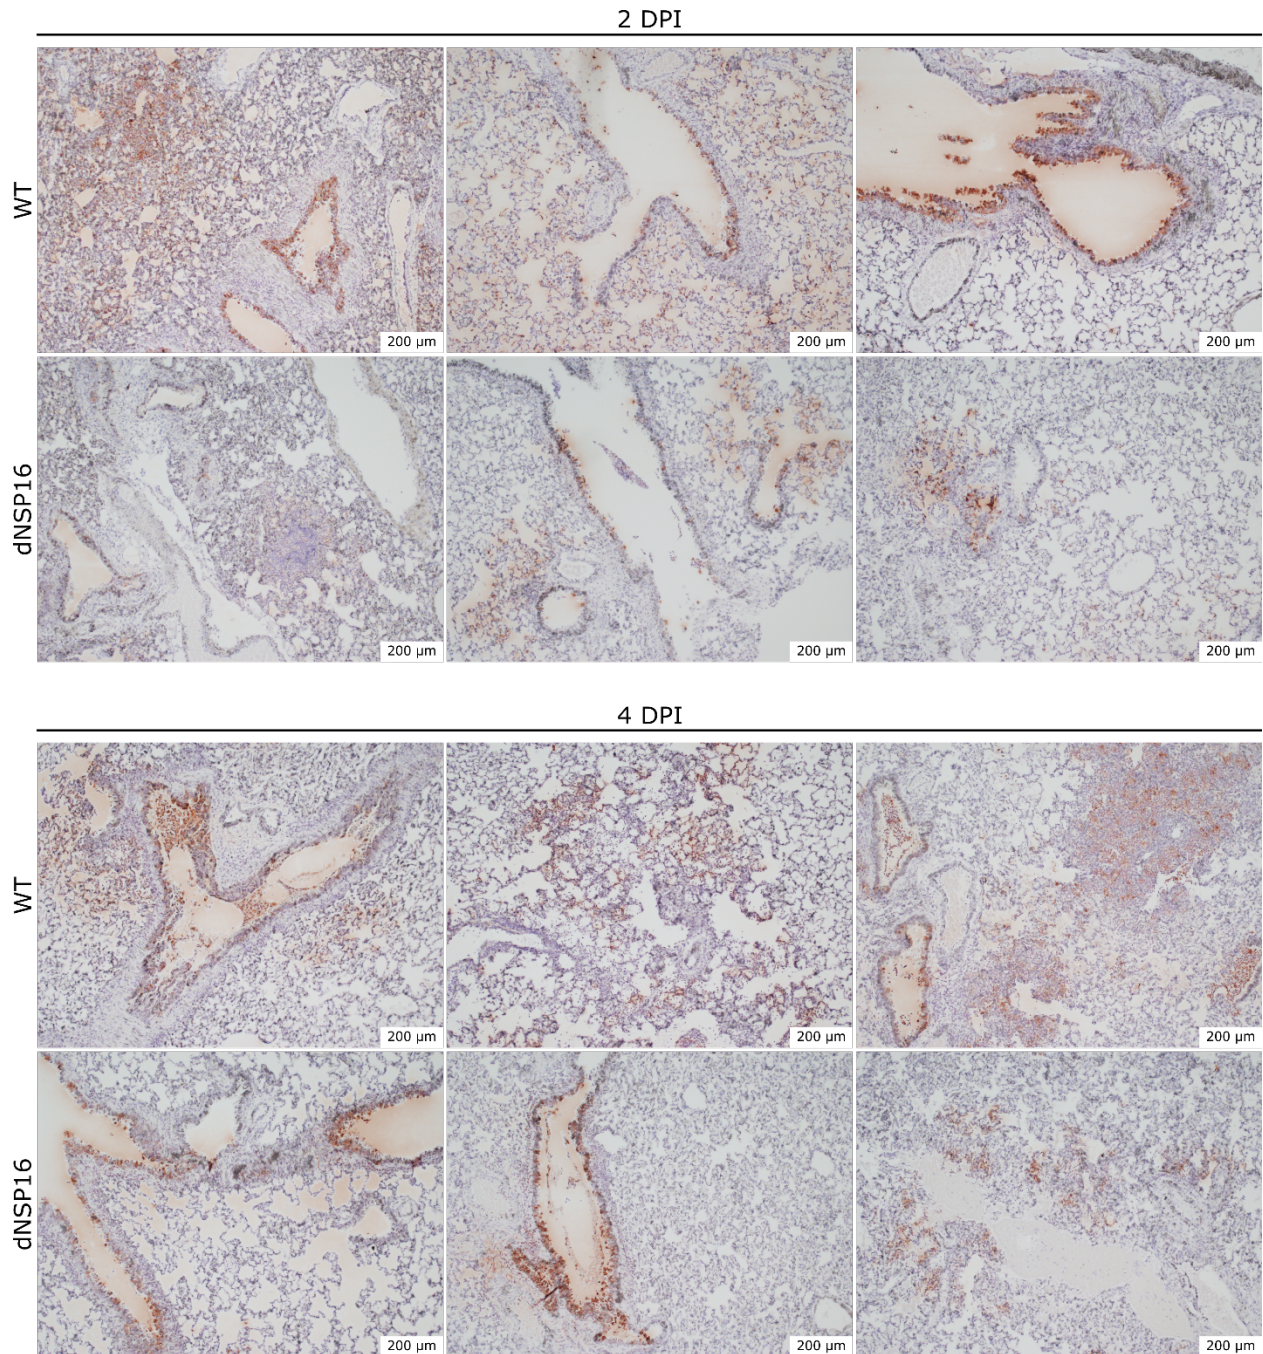

886

887 **Figure S4. dNSP16 replication is reduced *in vivo*.** SARS-CoV-2 nucleocapsid staining (brown) of  
888 representative 5  $\mu$ m-thick sections taken from left lung lobes of mock-, dNSP16, or WT-infected hamsters  
889 at the indicated day post-infection (DPI).

890

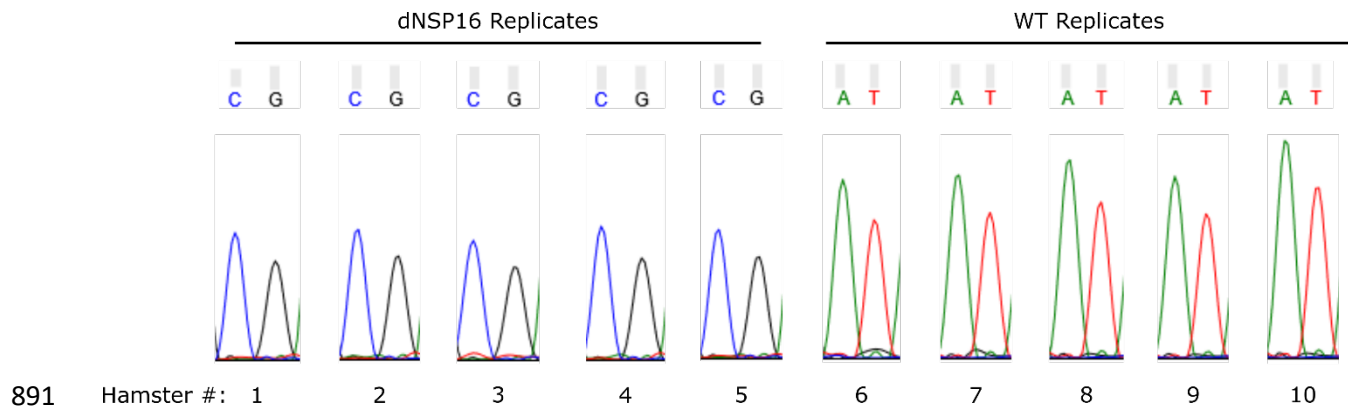

891

892 **Figure S5. No evidence of reversion of dNSP16 mutation was detected *in vivo*.** Viral RNA was  
 893 extracted from the lungs of hamsters infected with either dNSP16 or WT (numbered 1 through 5 for each  
 894 group) and which were sacrificed at 4 days post-infection. Viral RNA was reverse-transcribed, PCR-  
 895 amplified around the site of mutation, and Sanger sequenced. Shown are the sequencing traces of the 2-  
 896 base pair site within codon 130 of NSP16 that was mutated from AT to CG to engineer dNSP16.

897

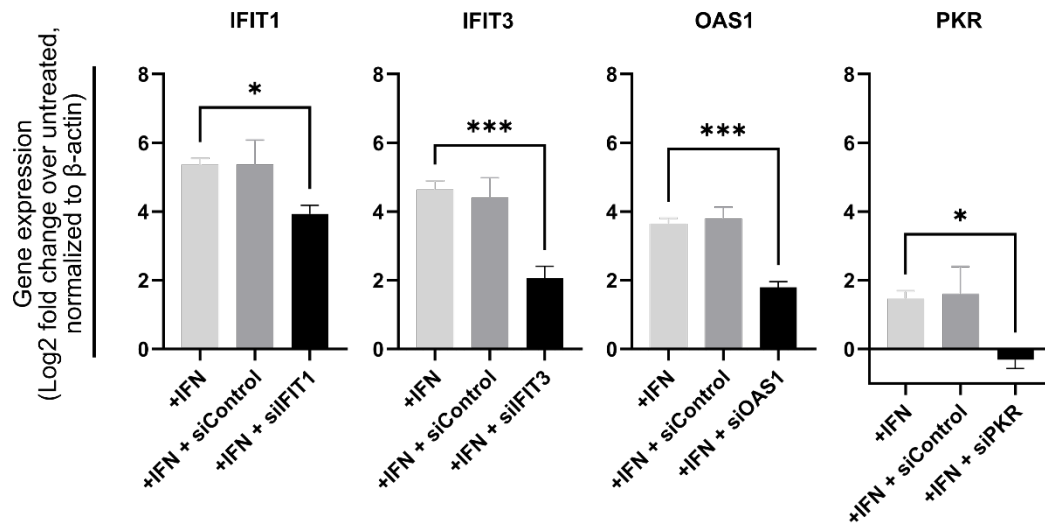

898

899 **Figure S6. Validation of knockdown of immune gene targets in Vero E6 cells.**  $1.25 \times 10^5$  Vero E6  
 900 cells/well were reverse transfected with 1 pmol of the control or gene-specific siRNA 2 days prior to  
 901 harvest and also treated with 100 U IFN-I one day prior to harvest and assessment of gene expression.  
 902 Fold change ( $\log_2$ ) of gene expression is measured relative to untreated samples (i.e. no IFN-I). All  
 903 samples were normalized to  $\beta$ -actin, used as a reference. \* $p < 0.05$ , \*\*\* $p < 0.005$ , ns = not significant:  
 904 results of one-way ANOVA with Tukey's multiple comparison test ( $\alpha = 0.05$ ). Means are plotted with error  
 905 bars denoting standard deviation.  $n = 3$  biological replicates.

906

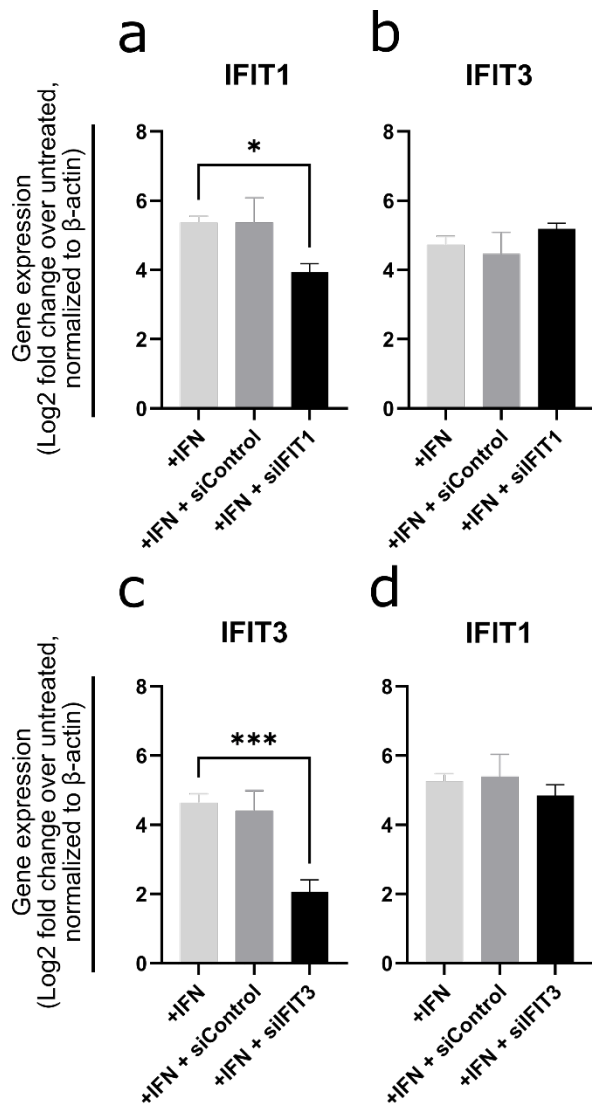

907

908 **Figure S7. Knockdown of either *IFIT1* or *IFIT3* is specific.**  $1.25 \times 10^5$  Vero E6 cells/well were reverse  
 909 transfected with 1 pmol/well of either a non-targeting siRNA ("siControl") or with an *IFIT1*- (a, b) or *IFIT3*-  
 910 (c, d) targeting siRNA ("siIFIT1" or "siIFIT3", respectively), or were seeded without treatment. One day  
 911 later, cells were treated with 100 U of IFN-I to induce interferon-stimulated genes. The following day,  
 912 cells were lysed for RNA purification and mRNA quantification via reverse transcription and quantitative  
 913 polymerase chain reaction (PCR). For all panels, gene expression is normalized to  $\beta$ -actin (used as a  
 914 reference), and fold changes are given relative to untreated controls (i.e. no IFN). \* $p < 0.05$ , \*\*\* $p < 0.005$ , ns  
 915 = not significant: results of one-way ANOVA with Tukey's multiple comparison test ( $\alpha = 0.05$ ). Means are  
 916 plotted with error bars denoting standard deviation.  $n = 3$  biological replicates.

917

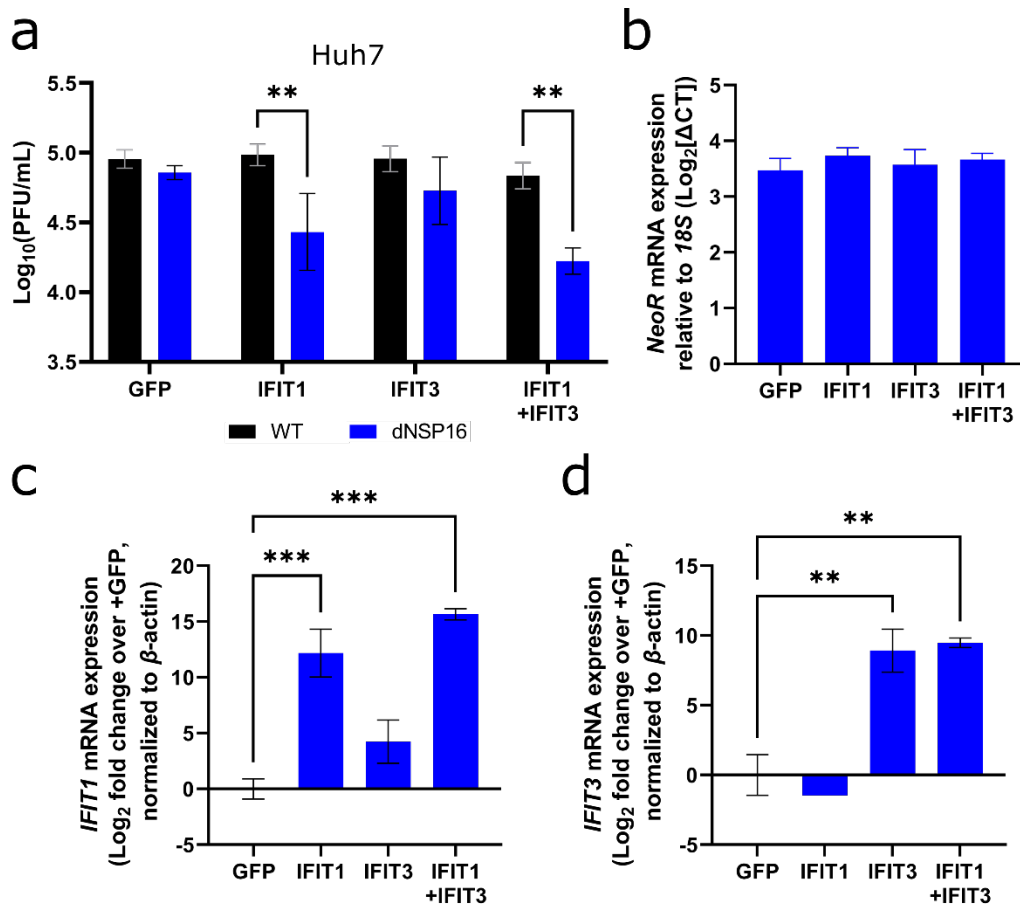

918

919 **Figure S8. Overexpression of *IFIT1* results in attenuation of dNSP16.** (a) Replication of WT (black)  
 920 and dNSP16 (blue) in the context of overexpression of IFIT plasmids.  $8.5 \times 10^4$  Huh7 cells/well were  
 921 reverse transfected with 0.8  $\mu\text{g}$  total of plasmid(s) expressing the indicated protein(s) 2 days prior to  
 922 infection, multiplicity of infection (MOI) = 0.01. Data shown at 50 hours post-infection (HPI).  $**p < 0.01$ :  
 923 results of two-way ANOVA with Tukey's multiple comparison test ( $\alpha = 0.05$ ),  $n = 3$ . (b – d) Relative  
 924 quantification of (b) *NeoR* (plasmid backbone), (c) *IFIT1*, or (d) *IFIT3* expression from RNA isolated from  
 925 unclarified supernatants at 25 HPI from the same dNSP16-infected samples as in (a).  $**p < 0.01$ ,  
 926  $***p < 0.005$ : results of one-way ANOVA with Tukey's multiple comparison test ( $\alpha = 0.05$ ). For all panels,  
 927 means are plotted with error bars denoting standard deviation. PFU = plaque-forming units.

928



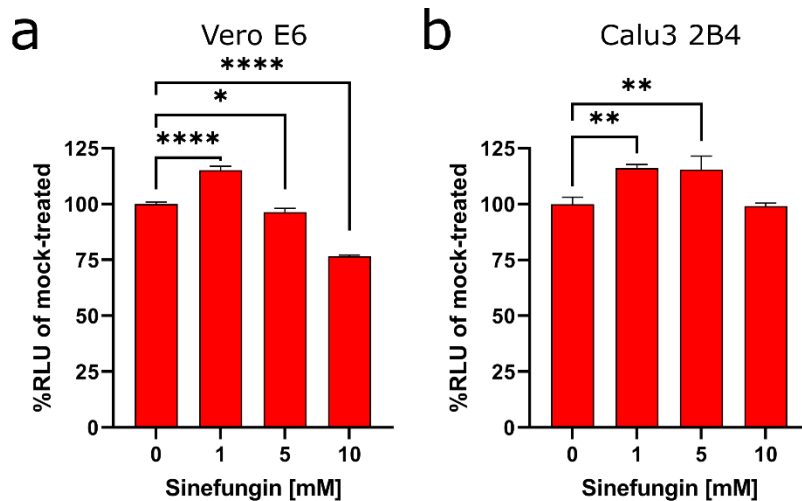

929

930 **Figure S9. Sinefungin decreases Vero E6, but not Calu3 2B4 viability.** (a, b) Cell viability post-  
 931 sinefungin treatment as measured by amount of luminescence detected in an ATP detection assay. (a)  $1$   
 932  $\times 10^3$  Vero E6 cells/well or (b)  $1.5 \times 10^3$  Calu3 2B4 cells/well were seeded in 96-well format one day  
 933 before sinefungin treatment. Data shown at 48 hours post-treatment. \* $p < 0.05$ , \*\* $p < 0.01$ , \*\*\*\* $p < 0.001$ :  
 934 results of one-way ANOVA with Tukey's multiple comparison test ( $\alpha = 0.05$ ). For all panels, means are  
 935 plotted with error bars denoting standard deviation.  $n = 3$  biological replicates for all data points. RLU =  
 936 relative light units. PFU = plaque-forming units.
